# Supplementary material for: How well does neonatal neuroimaging correlate with neurodevelopmental outcomes in infants with hypoxic-ischemic encephalopathy?
Source: PubMed Central journal article supplement (PMC10444609; doi:10.1038/s41390-023-02510-8), 2023-03-01

# HEAL Consort Diagram

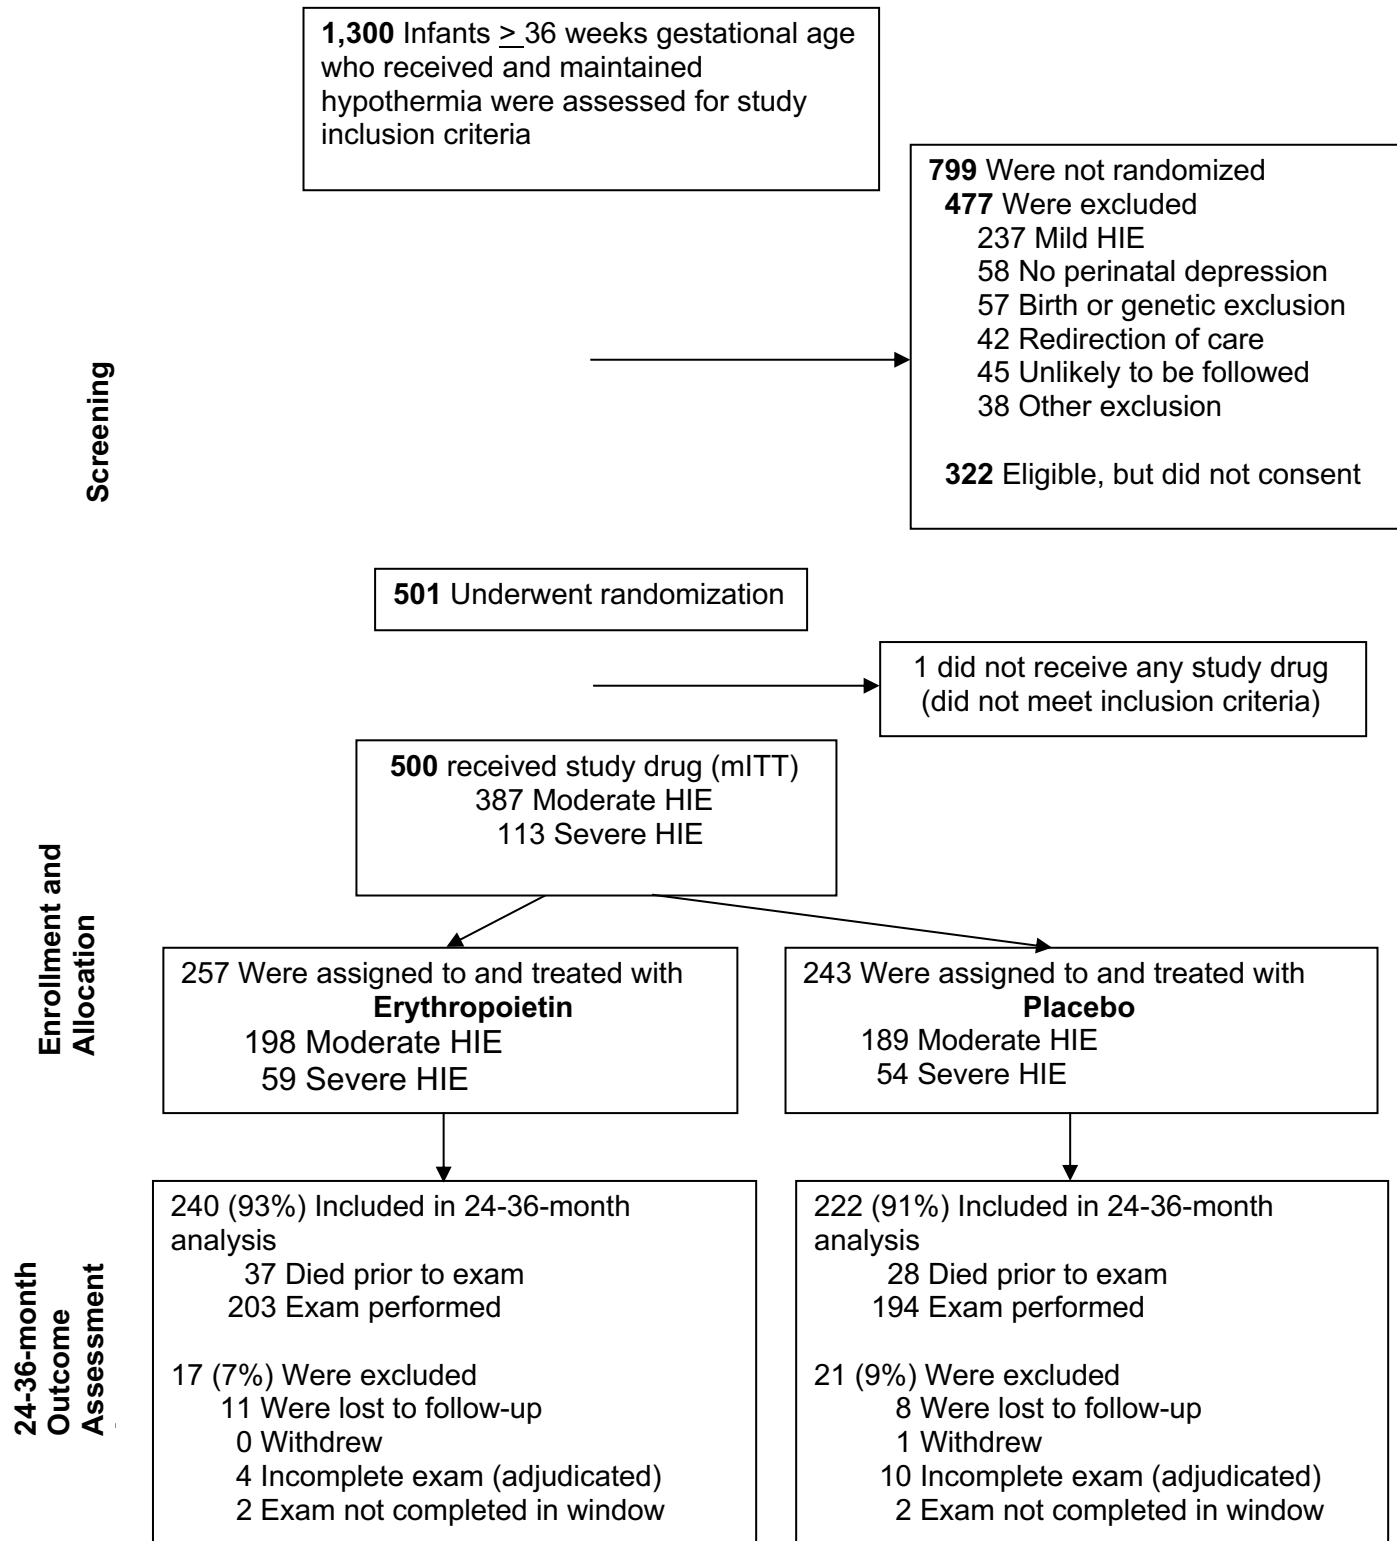

Supplement: 41390_2023_2510_MOESM4_ESM.pdf [file 41390_2023_2510_MOESM4_ESM.pdf]
